# Supplementary material
Source: PubMed Central journal article supplement (PMC7351404)
Supplement: mmc1.pdf [file mmc1.pdf]

# THE LANCET

## Rheumatology

### Supplementary appendix

This appendix formed part of the original submission. We post it as supplied by the authors.

Supplement to: Jones I, Bell LCK, Manson JJ, Last A, on behalf of the UCLH COVID Response Team. An adult presentation consistent with PIMS-TS. *Lancet Rheumatol* 2020; published online July 10. [https://doi.org/10.1016/S2665-9913\(20\)30234-4](https://doi.org/10.1016/S2665-9913(20)30234-4).

**Supplementary appendix**

**Manuscript title: An adult presentation consistent with PIMS-TS**

**Table S1**

| Test                                                                                                                                        | Result                                                                                    |
|---------------------------------------------------------------------------------------------------------------------------------------------|-------------------------------------------------------------------------------------------|
| <b>Bacterial assays</b>                                                                                                                     |                                                                                           |
| Blood cultures (x3)                                                                                                                         | No growth at 5 days                                                                       |
| Urine culture                                                                                                                               | No growth                                                                                 |
| Stool PCR panel ( <i>Salmonella</i> , <i>Shigella</i> , <i>Campylobacter</i> , VT <i>E.coli</i> , <i>Giardia</i> , <i>Cryptosporidium</i> ) | Negative                                                                                  |
| Stool <i>C.difficile</i>                                                                                                                    | Negative                                                                                  |
| <b>Viral assays</b>                                                                                                                         |                                                                                           |
| HIV                                                                                                                                         | Antibody/antigen negative                                                                 |
| EBV                                                                                                                                         | IgM negative, IgG positive, no detectable blood DNA                                       |
| CMV                                                                                                                                         | IgM negative, IgG negative, no detectable blood DNA                                       |
| HSV1/2                                                                                                                                      | No detectable blood DNA                                                                   |
| VZV                                                                                                                                         | No detectable blood DNA                                                                   |
| Enterovirus                                                                                                                                 | No detectable blood DNA                                                                   |
| Hepatitis B                                                                                                                                 | HbSAg negative, anti-HbS negative, anti-Hbc negative                                      |
| Hepatitis C                                                                                                                                 | Antibody screen negative                                                                  |
| Nose/throat swab panel (flu A/B, RSV, parainfluenza 1-4, hMPV, adenovirus, rhinovirus, seasonal coronavirus, parechovirus, enterovirus)     | Negative                                                                                  |
| Stool panel (adenovirus, astrovirus, rotavirus, norovirus G1/G2, sapovirus)                                                                 | Negative                                                                                  |
| SARS-CoV-2 nose/throat swab RT-PCR (x2)                                                                                                     | Negative                                                                                  |
| SARS-CoV-2 stool RT-PCR                                                                                                                     | Negative                                                                                  |
| SARS-CoV-2 IgM, IgA and IgG serology, pre-IVIg (flow cytometry assay)                                                                       | <b>Positive</b>                                                                           |
| <b>Auto-immune screening</b>                                                                                                                |                                                                                           |
| ANCA                                                                                                                                        | Negative                                                                                  |
| ANA                                                                                                                                         | Negative                                                                                  |
| ENA                                                                                                                                         | Negative                                                                                  |
| Rheumatoid factor                                                                                                                           | Negative                                                                                  |
| C3 and C4 titres                                                                                                                            | Within normal range                                                                       |
| <b>Other tests</b>                                                                                                                          |                                                                                           |
| Quantiferon                                                                                                                                 | Negative                                                                                  |
| ASO titre                                                                                                                                   | Negative                                                                                  |
| <i>Toxoplasma</i> antibodies                                                                                                                | Negative                                                                                  |
| Chest X-ray (x2)                                                                                                                            | No abnormalities detected                                                                 |
| CT abdomen and pelvis with contrast                                                                                                         | Mesenteric adenitis, mild terminal ileal thickening, no evidence of acute appendicitis    |
| 12-lead electrocardiogram                                                                                                                   | Sinus tachycardia                                                                         |
| Transthoracic echocardiogram                                                                                                                | Normal LVEF (lowest recorded – 63%), normal valves, no evident coronary artery dilatation |
| CT coronary angiogram                                                                                                                       | No focal aneurysmal dilatation of the coronaries                                          |

**Supplementary Table 1. Investigation results.** The table lists results of tests performed during admission. The use of a serological assay based on flow cytometry (reference 3 in main text) allowed us to confirm the temporal association with SARS-CoV-2 infection where PCR-based tests were negative.

**Figure S1**

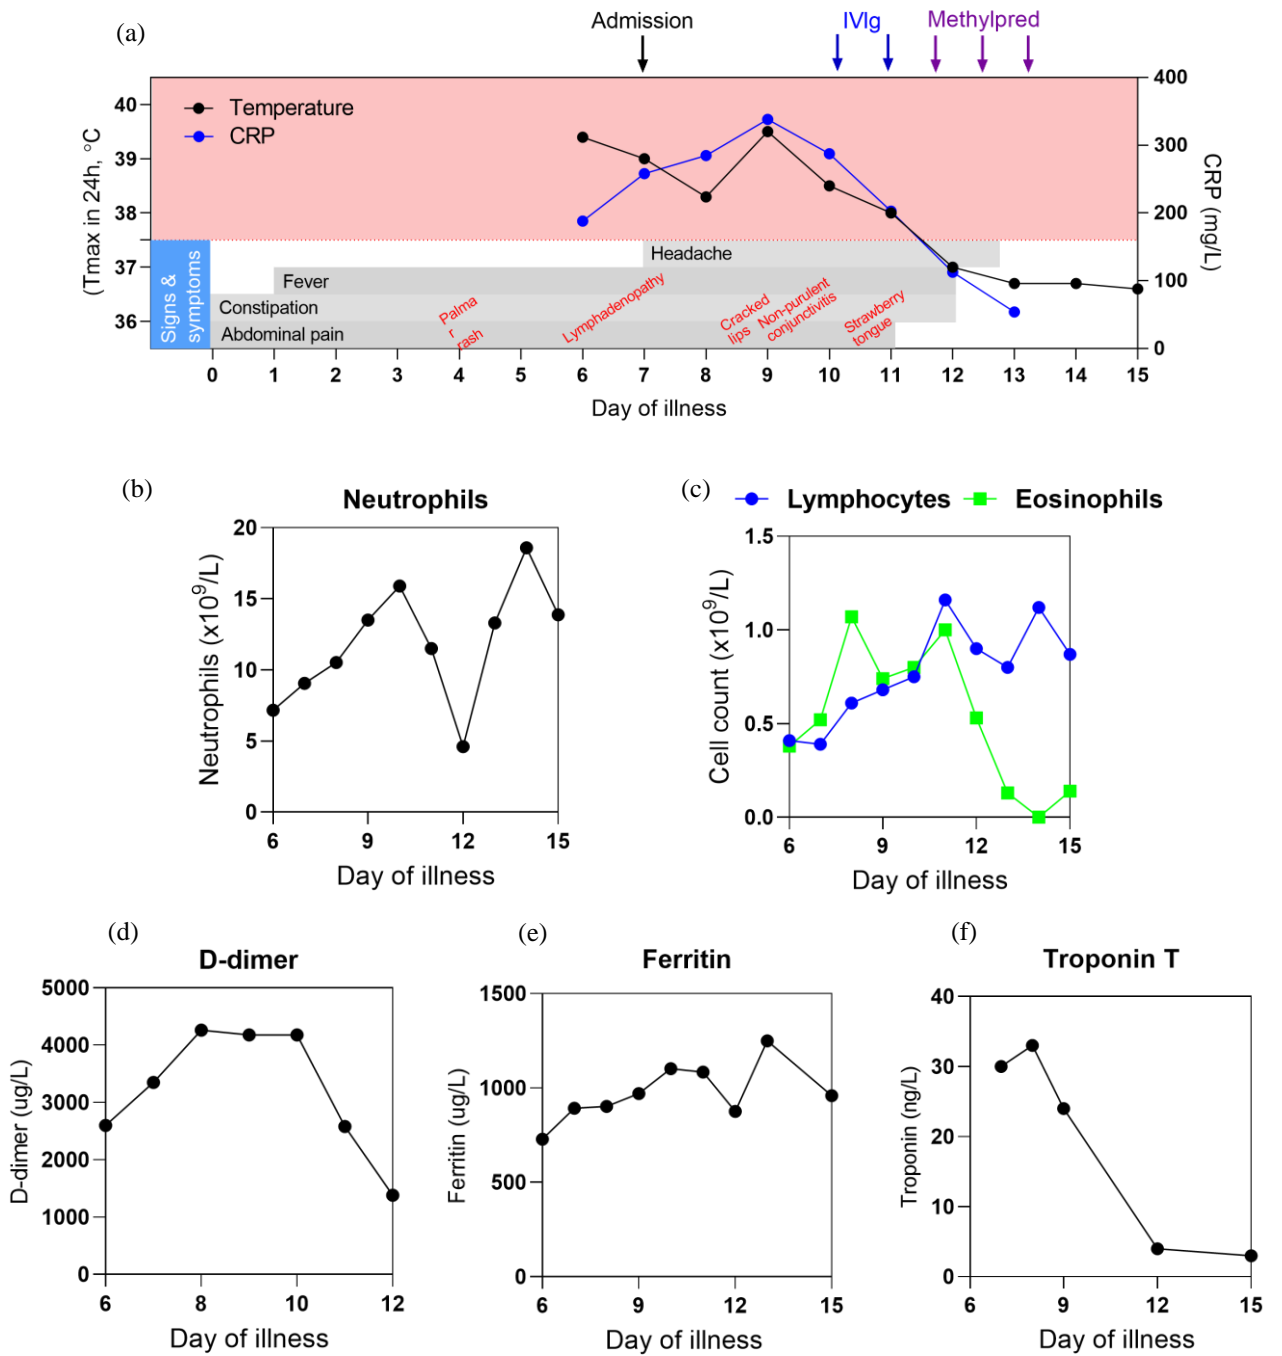

**Supplementary Figure 1. Disease time-course and response to treatment.** (a) The left-hand axis and black graph show the maximum temperature (Tmax) in °C in each 24 hour period. The right-hand axis and blue graph show the serum C-reactive protein (CRP) in mg/L. The timing of admission and treatments are shown above the graph. IVIg, total dose 2g/kg, was given as two split doses of 1g/kg at day 10 and 11. Methylprednisolone (1g) was given at days 11.5, 12.5 & 13.5. (b–f) Cell counts, D-dimer, ferritin and cardiac troponin-T over time.

**Figure S2**

(a)

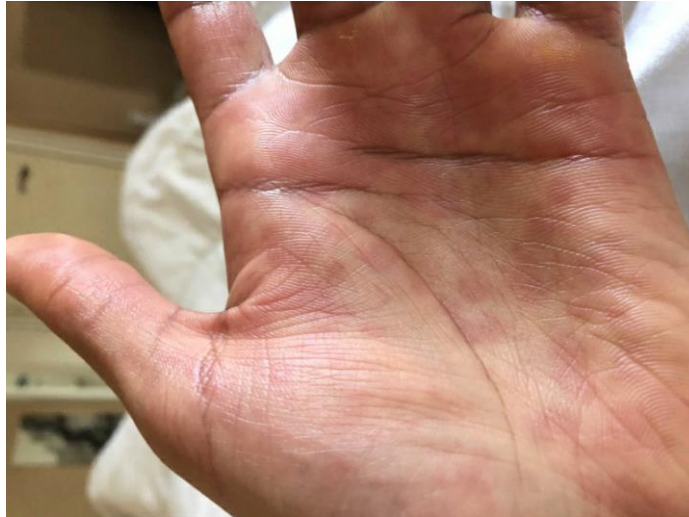

(b)

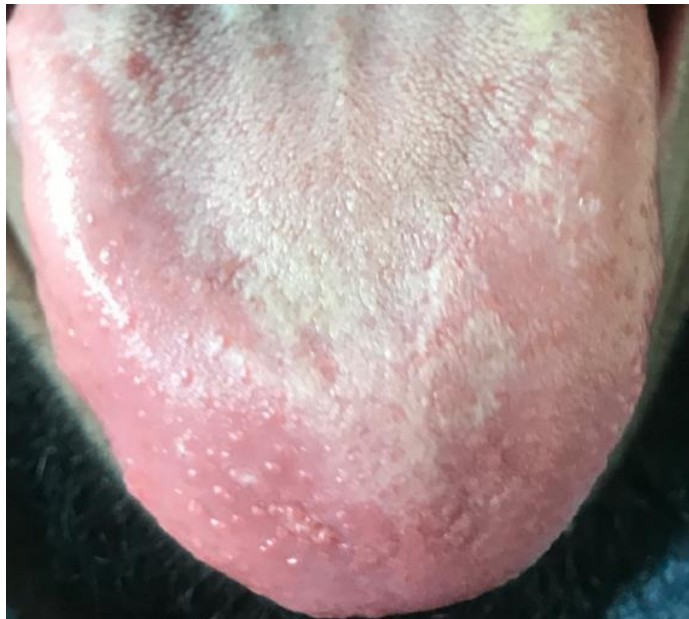

**Supplementary Figure 2. Kawasaki-like features.** (a) Maculopapular palmar rash noted by the patient on day 3–4 of illness. (b) Prominent lingual papillae, or ‘strawberry tongue’, noted on day 10–11 of illness.
